1 **Inter-reader agreement of  $^{18}\text{F}$ -FDG PET/CT for the quantification of**  
2 **carotid artery plaque inflammation**

3

4 Kjersti Johnsrud<sup>1,2\*</sup>, Therese Seierstad<sup>3</sup>, David Russell<sup>2,4</sup>, Mona-Elisabeth Revheim<sup>1,2</sup>

5

6 <sup>1</sup> Department of Nuclear Medicine, Division of Radiology and Nuclear Medicine, Oslo

7 University Hospital, Oslo, Norway

8 <sup>2</sup> Institute of Clinical Medicine, University of Oslo, Oslo, Norway

9 <sup>3</sup> Department for Research and Development, Division of Radiology and Nuclear Medicine,

10 Oslo University Hospital, Oslo, Norway

11 <sup>4</sup> Department of Neurology, Oslo University Hospital, Oslo, Norway

12

13 \*Corresponding author

14 E-mail: [kjersti@slogum.no](mailto:kjersti@slogum.no) (KJ)

15

16

17

18

19

20

21

22

## 23 **Abstract**

24 **Background:** A significant proportion of ischemic strokes are caused by emboli from  
25 unstable atherosclerotic carotid artery plaques with inflammation being a key feature of  
26 plaque instability and stroke risk. Positron emission tomography (PET) depicting the uptake  
27 of 2-deoxy-2-(<sup>18</sup>F)-fluoro-D-glucose (<sup>18</sup>F-FDG) in carotid artery plaques is a promising  
28 technique to quantify plaque inflammation. A consensus on the methodology for plaque  
29 localization and quantification of inflammation by <sup>18</sup>F-FDG PET/computed tomography (CT)  
30 in atherosclerosis has not been established. High inter-reader agreement is essential if <sup>18</sup>F-  
31 FDG PET/CT is to be used as a clinical tool for the assessment of unstable plaques and stroke  
32 risk. The aim of our study was to assess the inter-reader variability of different methods for  
33 quantification of <sup>18</sup>F-FDG uptake in carotid atherosclerotic plaques with a separate CT  
34 angiography (CTA) providing anatomical guidance.

35 **Methods and results:** Forty-three patients with carotid artery stenosis  $\geq 70\%$  underwent <sup>18</sup>F-  
36 FDG PET/CT. Two independent readers separately delineated the plaque in all axial PET  
37 slices containing the atherosclerotic plaque and the maximum standardized uptake value  
38 ( $SUV_{max}$ ) from each slice was measured. Uptake values with and without background  
39 correction were calculated. Intraclass correlation coefficients were highest for uncorrected  
40 uptake values (0.97-0.98) followed by those background corrected by subtraction (0.89-0.94)  
41 and lowest for those background corrected by division (0.74-0.79). There was a significant  
42 difference between the two readers definition of plaque extension, but this did not affect the  
43 inter-reader agreement of the uptake parameters.

44 **Conclusions:** Quantification methods without background correction have the highest inter-  
45 reader agreement for <sup>18</sup>F-FDG PET of carotid artery plaque inflammation. The use of the  
46 single highest uptake value (max  $SUV_{max}$ ) from the plaque will facilitate the method's clinical  
47 utility in stroke prevention.

## 48 **Introduction**

49           Ischemic strokes caused by thromboembolism from an unstable atherosclerotic plaque  
50 in the carotid artery can be prevented by carotid endarterectomy (CEA) [1-3]. Patients are  
51 selected for CEA based on the degree of carotid artery stenosis and presence or absence of  
52 cerebral ischemic symptoms. In recent years it has become increasingly clear that the degree  
53 of stenosis alone is not the best predictor of stroke risk. This has led to the concept of the  
54 ‘unstable plaque’ describing carotid plaques that carry high risk of stroke irrespective of the  
55 degree of artery stenosis and increased focus on factors that destabilize the plaque.

56 Inflammation plays a key role in the development of an unstable plaque [4-6].

57           Positron emission tomography (PET) imaging of atherosclerosis has been rapidly  
58 evolving since the first reports of 2-deoxy-2-(<sup>18</sup>F)-fluoro-D-glucose (<sup>18</sup>F-FDG) uptake  
59 localized to the inflammatory macrophage rich areas in carotid artery plaques [7]. The goal of  
60 the imaging technique is to detect carotid plaques that are at high risk of rupture and therefore  
61 carry high risk of stroke. <sup>18</sup>F-FDG PET for the detection of unstable plaques is not in clinical  
62 use [8], partly due to lack of feasible PET protocols and consensus regarding imaging  
63 procedure, method for <sup>18</sup>F-FDG uptake quantification and assessment of stroke risk, although  
64 several recommendations exist [9, 10]. PET is an imaging modality with limited anatomical  
65 information, and it might therefore be challenging to define the vessel-segment-of-interest.  
66 Computed tomography angiography (CTA) is often used together with <sup>18</sup>F-FDG PET when  
67 assessing patients with carotid artery stenosis, but selection of the plaque area for uptake  
68 measurements varies [11-13]. A requirement for introducing a diagnostic method into clinical  
69 routine is high inter-reader agreement. Inter-reader agreement has been studied for a few  
70 selected uptake parameters with generalized vascular inflammation [14, 15] and in patients  
71 with symptomatic carotid stenosis [12, 13], but to our knowledge no study has compared  
72 inter-reader agreement for different quantification methods.

73 The aim of this study was to assess inter-reader variability of different methods used  
74 for quantification of  $^{18}\text{F}$ -FDG uptake at PET/CT of carotid artery plaques.

75

## 76 **Materials and methods**

### 77 **Study population**

78 The study cohort consisted of forty-three patients with ultrasound-confirmed  
79 atherosclerosis with internal carotid artery stenosis  $\geq 70\%$  according to consensus criteria of  
80 the Society of Radiologists in Ultrasound [16]. Patient characteristics are summarized in  
81 Table 1. There were 30 men ( $66 \pm 9$  years) and 13 women ( $67 \pm 8$  years) with a mean age of  
82 66.2 years. The study protocol conformed with the ethical guidelines of the 1975 Declaration  
83 of Helsinki and was approved by the Norwegian Regional Committee for Medical and Health  
84 Research Ethics. Written informed consent was obtained from all patients prior to study  
85 inclusion.

86 **Table 1. Patient characteristics (n = 43) \***

|                                                             |                              |
|-------------------------------------------------------------|------------------------------|
| Age, years; mean $\pm$ SD                                   | 66.2 $\pm$ 8.4               |
| Sex, male; n (%)                                            | 30 (69.8)                    |
| Blood glucose, mmol·L <sup>-1</sup> ; mean $\pm$ SD (range) | 6.8 $\pm$ 2.2 (4.9 - 14.9)   |
| Bodyweight, kg; mean $\pm$ SD (range)                       | 82.4 $\pm$ 15 (55 - 110)     |
| Body mass index, kg/m <sup>2</sup> ; mean $\pm$ SD (range)  | 27.5 $\pm$ 4.5 (19.9 - 34.8) |

87 \*The patient material is included in previously published studies [17, 18].

88

89

90

91

92

## 93 **<sup>18</sup>F-FDG PET/CT examination**

94 After a minimum of six hours fasting the patients were injected with 5 MBq/kg <sup>18</sup>F-  
95 FDG and blood glucose, weight, and height were recorded. After approximately 90 minutes a  
96 two-bed position PET/CT from the base of the skull to the aortic arch was performed with 15  
97 minutes per bed position using a hybrid PET/CT scanner (Siemens Biograph 64, Siemens  
98 Medical Systems, Erlangen, Germany). The PET images were acquired with a 256x256  
99 matrix and the images were reconstructed to two millimetre thick slices, with four  
100 iterations/eight subsets ordered subset expectation–maximization (OSEM) algorithm and  
101 Gaussian post-reconstruction filter with 3.5 mm full width half maximum (FWHM). In  
102 addition to a non-contrast CT for attenuation correction a CTA with contrast filling of the  
103 arteries (minimum 40ml Iomeron (iodine 350mg/ml; Bracco Imaging S.P.A, Milan, Italy) or  
104 Visipaque (iodine 320mg/ml); GE Healthcare, Chicago, USA) was acquired immediately after  
105 the PET when still lying in the scanner for 16 of the 43 patients. For 24 patients CTA was  
106 performed at other radiologic departments. For three patients no CTA was available when the  
107 PET images were analysed.

108

## 109 **Image analyses and <sup>18</sup>F-FDG quantification**

110 The images were assessed with Hybrid Viewer 2.0 software (Hermes Medical  
111 Solutions AB, Stockholm, Sweden). Two experienced nuclear medicine senior consultants  
112 independently evaluated the <sup>18</sup>F-FDG PET/CT examinations. The two readers (R1 and R2)  
113 did not undergo any joint training before assessing the images, but they agreed on how to  
114 perform the analyses. The instructions were to use the CTA as guide for drawing the region of  
115 interests (ROIs) on the fused slices (PET and non-contrast CT). The plaque was defined as  
116 vessel wall thickening and a lumen contrast-filling defect on CTA [11]. The ROIs were drawn

117 around the entire vessel wall and lumen on all plaque-containing axial PET slices (Fig 1). For  
118 patients without CTA available, the plaque was defined as vessel wall with calcification and  
119 fat deposits in the level of the carotid bifurcation. Uptake in structures close to the plaque (e.g.  
120 lymph nodes, paravertebral muscles or salivary glands) that could falsify the plaque uptake  
121 values were excluded from the ROI. The number of plaque-containing slices for each patient  
122 was recorded. The pixel values in the PET images were converted into SUV and normalized  
123 to lean body mass [19].  $SUV_{max}$  in all plaque containing ROIs were recorded. Background  
124 blood pool activity was obtained from four ROIs placed in the lumen of the jugular vein away  
125 from structures with  $^{18}F$ -FDG uptake but preferably in the same craniocaudal level as the  
126 plaque. The background was calculated as the mean of the  $SUV_{mean}$  in these four ROIs.  
127 Different measures of  $^{18}F$ -FDG uptake were calculated (Table 2) as previously described in  
128 detail [17]. Blood background corrected values were calculated as the  $^{18}F$ -FDG uptake values  
129 divided by the mean blood pool activity (TBR) and subtraction of the blood pool activity from  
130 the  $^{18}F$ -FDG uptake values (corrected SUV (cSUV)).

131

132 **Fig 1. Region of interest.** On each plaque-containing axial slice a region of interest (ROI)  
133 was drawn manually around the entire vessel wall including the plaque and the lumen. A  
134 (fused PET/non-contrast CT) and B (PET) show increased uptake (arrow) in the plaque in the  
135 right internal carotid artery. C shows how the plaque location on contrast enhanced CT (low  
136 attenuation plaque with thin contrast filled lumen in the centre) guides the actual drawing of  
137 the ROI (green dotted line) on the fused PET/non-contrast CT (D).

138

139

140

141

142 **Table 2. Plaque  $^{18}\text{F}$ -FDG uptake measures.**

| <b>Uptake measure</b>            | <b>Description</b>                                                                                                             |
|----------------------------------|--------------------------------------------------------------------------------------------------------------------------------|
| max $\text{SUV}_{\text{max}}$    | the single highest $\text{SUV}_{\text{max}}$                                                                                   |
| mean $\text{SUV}_{\text{max}}$   | mean of all plaque $\text{SUV}_{\text{max}}$                                                                                   |
| MDS3*                            | mean $\text{SUV}_{\text{max}}$ of the three contiguous slices centered on the slice with the highest $\text{SUV}_{\text{max}}$ |
| MDS5*                            | mean $\text{SUV}_{\text{max}}$ of the five contiguous slices centered on the slice with the highest $\text{SUV}_{\text{max}}$  |
| mean $\text{SUV}_{\text{max}}^4$ | mean $\text{SUV}_{\text{max}}$ of the four slices with highest $\text{SUV}_{\text{max}}$                                       |

143 \*MDS, most diseased segment

144

## 145 **Statistical analysis**

146 The IBM SPSS Statistics software for Windows (version 25.0; IBM Corp., Armonk,  
147 USA) was used for data analyses. Groups of paired data were compared using the Wilcoxon  
148 signed rank test for non-normally distributed variables. Inter-reader agreement was calculated  
149 using intraclass correlation coefficients (ICC's; model two-way random, type absolute  
150 agreement). All statistical results were considered significant when  $p < 0.05$ . All uptake  
151 values per patient can be found in a supplementary data file (S1 File).

152

153

154

155

156

157

158

159

## 160 Results

161 The different  $^{18}\text{F}$ -FDG uptake values for the two readers are summarized in Table 3.  
 162 Reader 2 identified significantly more slices as plaque containing (median; 10, range; 4-23)  
 163 than reader 1 (median; 9, range; 3-18) ( $p = 0.001$ ).

164

165 **Table 3.  $^{18}\text{F}$ -FDG uptake values and intraclass correlation coefficients between the two**  
 166 **readers (n = 43 patients)**

| Quantification method          | $^{18}\text{F}$ -FDG uptake values |                    |          | ICC  |
|--------------------------------|------------------------------------|--------------------|----------|------|
|                                | Reader 1                           | Reader 2           | <i>p</i> |      |
| Max SUV <sub>max</sub>         | 1.74 (1.18 - 2.66)                 | 1.74 (1.20 - 2.66) | 0.304    | .979 |
| Mean SUV <sub>max</sub>        | 1.51 (1.11 - 2.28)                 | 1.51 (1.06 - 2.15) | 0.687    | .973 |
| MDS3                           | 1.68 (1.17 - 2.51)                 | 1.68 (1.19 - 2.51) | 0.400    | .978 |
| MDS5                           | 1.64 (1.15 - 2.32)                 | 1.63 (1.17 - 2.45) | 0.438    | .972 |
| Mean SUV <sub>max</sub> 4      | 1.68 (1.15 - 2.45)                 | 1.68 (1.13 - 2.45) | 0.060    | .972 |
| Background                     | 0.87 (0.55 - 1.26)                 | 0.89 (0.55 - 1.30) | 0.245    | .767 |
| TBR max SUV <sub>max</sub>     | 1.95 (1.34 - 3.07)                 | 2.02 (1.34 - 2.68) | 0.314    | .792 |
| TBR mean SUV <sub>max</sub>    | 1.72 (1.16 - 2.59)                 | 1.76 (1.25 - 2.37) | 0.232    | .741 |
| TBR MDS3                       | 1.87 (1.26 - 2.89)                 | 1.97 (1.30 - 2.55) | 0.296    | .775 |
| TBR MDS5                       | 1.80 (1.22 - 2.79)                 | 1.94 (1.24 - 2.53) | 0.241    | .769 |
| TBR mean SUV <sub>max</sub> 4  | 1.81 (1.26 - 2.82)                 | 1.93 (1.31 - 2.61) | 0.358    | .758 |
| cSUV max SUV <sub>max</sub>    | 0.83 (0.42 - 1.79)                 | 0.87 (0.38 - 1.67) | 0.837    | .944 |
| cSUV mean SUV <sub>max</sub>   | 0.68 (0.20 - 1.28)                 | 0.68 (0.28 - 1.19) | 0.435    | .893 |
| cSUV MDS3                      | 0.80 (0.33 - 1.64)                 | 0.79 (0.34 - 1.51) | 0.769    | .931 |
| cSUV MDS5                      | 0.75 (0.28 - 1.45)                 | 0.76 (0.27 - 1.45) | 0.595    | .916 |
| cSUV mean SUV <sub>max</sub> 4 | 0.74 (0.32 - 1.58)                 | 0.77 (0.35 - 1.45) | 0.975    | .919 |

167 Data are given as median (range). *P*-value from Wilcoxon signed ranks test. SUV,  
 168 standardized uptake value; MDS, most diseased segment; TBR, target-to-background ratio;  
 169 cSUV, background subtracted SUV; ICC, intraclass correlation coefficient.

170

171 There were no differences in  $^{18}\text{F}$ -FDG uptake between the two readers (Table 3). The  
 172 ICC for the different  $^{18}\text{F}$ -FDG quantification methods was highest for uncorrected SUVs  
 173 (0.97-0.98) followed by cSUVs (0.89-0.94) and TBRs (0.74-0.79), and 0.77 for the



174 background blood pool (Table 3). The differences in the median for the uptake values  
175 between the readers ranged from 0.00 and 0.01 for the uncorrected SUVs to 0.04-0.14 for  
176 TBRs (0.14 for TBR MDS5). The difference for the background value was 0.02 (Table 3).

177 Fig 2 shows the differences in max  $SUV_{max}$  and mean  $SUV_{max}$  for individual patients  
178 for the two readers without background correction (A and B), and the corresponding values  
179 when the  $^{18}F$ -FDG uptake is corrected for background blood pool by division (TBR; 2C and  
180 2D) and by subtraction (cSUV; 2E and 2F). The difference in venous background is shown in  
181 Fig 2G. The difference between the readers is highest for the uptake values corrected for  
182 background blood pool by division (2C and 2D). and lowest for the uptake values without  
183 background correction (2A and 2B).

184

185 **Fig 2. Inter-reader difference for the  $^{18}F$ -FDG quantification methods.** Difference  
186 between the readers (R2 minus R1, y-axis)) for the included patients (x-axis). Max  $SUV_{max}$   
187 (A), mean  $SUV_{max}$  (B), TBR max  $SUV_{max}$  (C), TBR mean  $SUV_{max}$  (D), cSUV max  $SUV_{max}$   
188 (E), cSUV mean  $SUV_{max}$  (F), and venous background (G).

189

## 190 Discussion

191 In this study we found high inter-reader agreement between different methods for  $^{18}F$ -  
192 FDG uptake quantification of inflammation in high grade carotid artery stenosis. The inter-  
193 reader agreement was highest for the methods without background correction. Two studies in  
194 patients with carotid stenosis supports our finding that methods without correction for  
195 background blood activity have higher inter-reader agreement than background corrected  
196 values: Kwee et al. [12] reported an ICC of 0.61 for TBR mean  $SUV_{max}$  and 0.65 for TBR  
197 max  $SUV_{max}$ , and Marnane et al. [13] found an ICC of 0.99 for mean  $SUV_{max}$ .

198 In our study the highest ICC was found for max  $SUV_{max}$  (0.98). For the methods  
199 without background blood pool correction only 12% of the max  $SUV_{max}$  and 14% of the mean  
200  $SUV_{max}$  measurements differed with more than  $\pm 0.10$  (Fig 2A, B). Patient number 42 is an  
201 outlier with an inter-reader difference of 0.38. This is probably due to different delineations of  
202 the plaque ROIs as this patient had high uptake in neighbouring muscle (Fig 3). Reader 1 can  
203 have excluded more of the plaque ROIs to be sure to avoid spill-in activity than reader 2. The  
204 problem with spill-in from neighbouring structures is due to the relatively low spatial  
205 resolution of PET combined with unspecific uptake of  $^{18}F$ -FDG.

206

207 **Fig 3. Spill-in activity.** Fused image of non-contrast CT and PET (A) and contrast enhanced  
208 CT (B) show a plaque in the level of the right carotid bifurcation with low uptake but with  
209 high uptake in nearby muscles. PET with normal intensity on the SUV scale (C) and PET with  
210 high intensity on the SUV scale (D) show that  $^{18}F$ -FDG uptake from nearby muscle activity  
211 influences the ROI around the plaque (inserted picture at 4 to 5 o'clock position).

212

213 For the background corrected values, the difference was larger with 40% of TBR max  
214  $SUV_{max}$  and 30% of TBR mean  $SUV_{max}$  having a difference of  $\pm 0.25$  or more (Fig 2C, D). In  
215 our previous study exploring  $^{18}F$ -FDG-uptake in symptomatic versus asymptomatic patients  
216 [18] the difference in median mean  $SUV_{max}$  between the groups was 0.32 (1.75 versus 1.43).  
217 In two studies using TBR max  $SUV_{max}$  as uptake parameter the difference was found to be  
218 0.19 and 0.29 [20, 21]. Thus, methods with reader difference of 0.25 prohibit differentiation  
219 between symptomatic and asymptomatic patients.

220 We found an ICC for background blood pool activity of 0.77. This discordant  
221 assessment of background blood pool activity introduces variation in TBR and cSUVs due to  
222 methodology rather than biology. The background blood pool activity in our study was

223 obtained from four ROIs within the lumen of the jugular vein preferably in the same  
224 craniocaudal level as the plaque. The vena jugularis has a small diameter and it was often  
225 challenging to draw reproducible ROIs within the vein that excluded contribution from  
226 neighbouring structures. In a  $^{18}\text{F}$ -FDG PET study of generalized vascular inflammation in  
227 which the background blood pool activity was obtained from eight ROIs in the jugular vein  
228 the ICC for TBR mean  $\text{SUV}_{\text{max}}$  of the carotid arteries was 0.94-0.96 [14]. This suggests that  
229 including data from more slices or from a larger vessel segment such as the vena cava  
230 superior or atria of the heart could have reduced the inter-reader variability of measuring the  
231 blood pool activity. In this study the two readers also had trained together by co-reading  
232 several pilot studies before they established an analysis protocol [14]. This is optimal for  
233 research studies, but hard to accomplish in larger trials where the readers often are located in  
234 different departments.

235         There is a large amount of studies that quantifies the  $^{18}\text{F}$ -FDG uptake in the vessel  
236 wall of patients with suspected generalized vascular inflammation (atherosclerosis not  
237 necessarily confirmed by other imaging methods). Although our findings cannot  
238 automatically be generalized, one might question the need for background correction for these  
239 patients.

240         Reader 2 included significantly more plaque-containing slices than reader 1. This did  
241 not reduce the ICC of the  $^{18}\text{F}$ -FDG measurements, supporting that the plaque slices with the  
242 highest uptake values all were included in both readers plaque area and that the number of  
243 slices included in the plaque area has minimal influence on mean  $\text{SUV}_{\text{max}}$ . Our interpretation  
244 of this finding is that the plaque inflammation we can detect with  $^{18}\text{F}$ -FDG PET is  
245 homogeneously spread out, and also present in the extreme tails of the plaque. This was also  
246 one of our main findings when we explored associations between different  $^{18}\text{F}$ -FDG uptake  
247 parameters and plaque inflammation at histopathology [17]. Furthermore, this is in

248 accordance with the study results from Kwee et al. [12] who found a strong correlation  
249 between TBRs of ipsilateral symptomatic plaques and contralateral asymptomatic plaques and  
250 supports the hypothesis that plaque inflammation is systemic to some extent.

251 A strength of our study is a relatively large patient population with a wide range of  
252 uptake values (max SUV<sub>max</sub> from 1.18 to 2.66) representing low to high plaque inflammatory  
253 activity confirmed by histology [17].

254 In conclusion, our study confirms the reproducibility of quantification of <sup>18</sup>F-FDG  
255 uptake in carotid artery plaques and supports the superiority of quantification methods that do  
256 not include blood pool background. The ICC was highest for max SUV<sub>max</sub> (the single highest  
257 uptake value within the plaque) and thus, our suggestion is to further explore this parameter  
258 for atherosclerosis imaging.

259

## 260 **Supporting information**

261 **S1 File.** SPSS file with individual <sup>18</sup>F-FDG uptake measurements.

262

## 263 **Author Contributions**

| <b>Contributor Role</b>  | <b>Role Definition</b>                                                                                                                                           |
|--------------------------|------------------------------------------------------------------------------------------------------------------------------------------------------------------|
| <b>Conceptualization</b> | Kjersti Johnsrud, Therese Seierstad, David Russell, Mona-Elisabeth Revheim<br><br><b>Ideas; formulation or evolution of overarching research goals and aims.</b> |

|                               |                                                                                                                                                                                                                                                      |
|-------------------------------|------------------------------------------------------------------------------------------------------------------------------------------------------------------------------------------------------------------------------------------------------|
| <b>Data Curation</b>          | <p>Kjersti Johnsrud</p> <p><b>Management activities to annotate (produce metadata), scrub data and maintain research data (including software code, where it is necessary for interpreting the data itself) for initial use and later reuse.</b></p> |
| <b>Formal Analysis</b>        | <p>Kjersti Johnsrud, Therese Seierstad, Mona-Elisabeth Revheim</p> <p><b>Application of statistical, mathematical, computational, or other formal techniques to analyze or synthesize study data.</b></p>                                            |
| <b>Funding Acquisition</b>    | <p>David Russell</p> <p><b>Acquisition of the financial support for the project leading to this publication.</b></p>                                                                                                                                 |
| <b>Investigation</b>          | <p>Kjersti Johnsrud, Therese Seierstad, Mona-Elisabeth Revheim</p> <p><b>Conducting a research and investigation process, specifically performing the experiments, or data/evidence collection.</b></p>                                              |
| <b>Methodology</b>            | <p>Kjersti Johnsrud, Therese Seierstad, David Russell, Mona-Elisabeth Revheim</p> <p><b>Development or design of methodology; creation of models</b></p>                                                                                             |
| <b>Project Administration</b> | <p>David Russell</p> <p><b>Management and coordination responsibility for the research activity planning and execution.</b></p>                                                                                                                      |
| <b>Resources</b>              | <p>David Russell, Therese Seierstad, Mona-Elisabeth Revheim</p> <p><b>Provision of study materials, reagents, materials, patients, laboratory samples, animals, instrumentation, computing resources, or other analysis tools.</b></p>               |
| <b>Supervision</b>            | <p>David Russell, Therese Seierstad, Mona-Elisabeth Revheim</p> <p><b>Oversight and leadership responsibility for the research activity planning and execution, including mentorship external to the core team.</b></p>                              |

|                                             |                                                                                                                                                                                                                                                                                                   |
|---------------------------------------------|---------------------------------------------------------------------------------------------------------------------------------------------------------------------------------------------------------------------------------------------------------------------------------------------------|
| <b>Validation</b>                           | Kjersti Johnsrud, Therese Seierstad, Mona-Elisabeth Revheim<br><b>Verification, whether as a part of the activity or separate, of the overall replication/reproducibility of results/experiments and other research outputs.</b>                                                                  |
| <b>Visualization</b>                        | Kjersti Johnsrud, Therese Seierstad<br><b>Preparation, creation and/or presentation of the published work, specifically visualization/data presentation.</b>                                                                                                                                      |
| <b>Writing – Original Draft Preparation</b> | Kjersti Johnsrud, Therese Seierstad, Mona-Elisabeth Revheim<br><b>Creation and/or presentation of the published work, specifically writing the initial draft (including substantive translation).</b>                                                                                             |
| <b>Writing – Review &amp; Editing</b>       | Kjersti Johnsrud, Therese Seierstad, David Russell, Mona-Elisabeth Revheim<br><b>Preparation, creation and/or presentation of the published work by those from the original research group, specifically critical review, commentary or revision – including pre- or post-publication stages.</b> |

264

## 265 **References**

- 266 1. Gasecki AP, Eliasziw M, Ferguson GG, Hachinski V, Barnett HJ. Long-term prognosis and effect  
267 of endarterectomy in patients with symptomatic severe carotid stenosis and contralateral carotid  
268 stenosis or occlusion: results from NASCET. North American Symptomatic Carotid Endarterectomy  
269 Trial (NASCET) Group. Journal of neurosurgery. 1995;83(5):778-82.
- 270 2. Group ECSTCE. Randomised trial of endarterectomy for recently symptomatic carotid  
271 stenosis: final results of the MRC European Carotid Surgery Trial (ECST). Lancet.  
272 1998;351(9113):1379-87.
- 273 3. Barnett HJ, Taylor DW, Eliasziw M, Fox AJ, Ferguson GG, Haynes RB, et al. Benefit of carotid  
274 endarterectomy in patients with symptomatic moderate or severe stenosis. North American  
275 Symptomatic Carotid Endarterectomy Trial Collaborators. The New England journal of medicine.  
276 1998;339(20):1415-25.
- 277 4. Libby P. Inflammation in atherosclerosis. Nature. 2002;420(6917):868-74.
- 278 5. Stoll G, Bendszus M. Inflammation and atherosclerosis: novel insights into plaque formation  
279 and destabilization. Stroke. 2006;37(7):1923-32.

- 280 6. Jander S, Sitzer M, Schumann R, Schroeter M, Siebler M, Steinmetz H, et al. Inflammation in  
281 high-grade carotid stenosis: a possible role for macrophages and T cells in plaque destabilization.  
282 *Stroke*. 1998;29(8):1625-30.
- 283 7. Rudd JH, Warburton EA, Fryer TD, Jones HA, Clark JC, Antoun N, et al. Imaging atherosclerotic  
284 plaque inflammation with [18F]-fluorodeoxyglucose positron emission tomography. *Circulation*.  
285 2002;105(23):2708-11.
- 286 8. Chowdhury MM, Tarkin JM, Evans NR, Le E, Warburton EA, Hayes PD, et al. (18)F-FDG Uptake  
287 on PET/CT in Symptomatic versus Asymptomatic Carotid Disease: a Meta-Analysis. *European journal*  
288 *of vascular and endovascular surgery : the official journal of the European Society for Vascular*  
289 *Surgery*. 2018;56(2):172-9.
- 290 9. Bucerius J, Hyafil F, Verberne HJ, Slart RH, Lindner O, Sciagra R, et al. Position paper of the  
291 Cardiovascular Committee of the European Association of Nuclear Medicine (EANM) on PET imaging  
292 of atherosclerosis. *European journal of nuclear medicine and molecular imaging*. 2016;43(4):780-92.
- 293 10. Huet P, Burg S, Le Guludec D, Hyafil F, Buvat I. Variability and uncertainty of 18F-FDG PET  
294 imaging protocols for assessing inflammation in atherosclerosis: suggestions for improvement.  
295 *Journal of nuclear medicine : official publication, Society of Nuclear Medicine*. 2015;56(4):552-9.
- 296 11. Graebe M, Borgwardt L, Hojgaard L, Sillesen H, Kjaer A. When to image carotid plaque  
297 inflammation with FDG PET/CT. *Nuclear medicine communications*. 2010;31(9):773-9.
- 298 12. Kwee RM, Truijman MT, Mess WH, Teule GJ, ter Berg JW, Franke CL, et al. Potential of  
299 integrated [18F] fluorodeoxyglucose positron-emission tomography/CT in identifying vulnerable  
300 carotid plaques. *AJNR American journal of neuroradiology*. 2011;32(5):950-4.
- 301 13. Marnane M, Merwick A, Sheehan OC, Hannon N, Foran P, Grant T, et al. Carotid plaque  
302 inflammation on 18F-fluorodeoxyglucose positron emission tomography predicts early stroke  
303 recurrence. *Annals of neurology*. 2012;71(5):709-18.
- 304 14. Rudd JH, Myers KS, Bansilal S, Machac J, Pinto CA, Tong C, et al. Atherosclerosis inflammation  
305 imaging with 18F-FDG PET: carotid, iliac, and femoral uptake reproducibility, quantification methods,  
306 and recommendations. *Journal of nuclear medicine : official publication, Society of Nuclear Medicine*.  
307 2008;49(6):871-8.
- 308 15. Rudd JH, Myers KS, Bansilal S, Machac J, Rafique A, Farkouh M, et al. (18)Fluorodeoxyglucose  
309 positron emission tomography imaging of atherosclerotic plaque inflammation is highly reproducible:  
310 implications for atherosclerosis therapy trials. *Journal of the American College of Cardiology*.  
311 2007;50(9):892-6.
- 312 16. Grant EG, Benson CB, Moneta GL, Alexandrov AV, Baker JD, Bluth EI, et al. Carotid artery  
313 stenosis: gray-scale and Doppler US diagnosis--Society of Radiologists in Ultrasound Consensus  
314 Conference. *Radiology*. 2003;229(2):340-6.

- 315 17. Johnsrud K, Skagen K, Seierstad T, Skjelland M, Russell D, Revheim ME. (18)F-FDG PET/CT for  
316 the quantification of inflammation in large carotid artery plaques. *Journal of nuclear cardiology* :  
317 official publication of the American Society of Nuclear Cardiology. 2019;26(3):883-93.
- 318 18. Skagen K, Johnsrud K, Evensen K, Scott H, Krohg-Sorensen K, Reier-Nilsen F, et al. Carotid  
319 plaque inflammation assessed with (18)F-FDG PET/CT is higher in symptomatic compared with  
320 asymptomatic patients. *International journal of stroke : official journal of the International Stroke*  
321 *Society*. 2015;10(5):730-6.
- 322 19. Boellaard R, Delgado-Bolton R, Oyen WJ, Giammarile F, Tatsch K, Eschner W, et al. FDG  
323 PET/CT: EANM procedure guidelines for tumour imaging: version 2.0. *European journal of nuclear*  
324 *medicine and molecular imaging*. 2015;42(2):328-54.
- 325 20. Muller HF, Viaccoz A, Fisch L, Bonvin C, Lovblad KO, Ratib O, et al. 18FDG-PET-CT: an imaging  
326 biomarker of high-risk carotid plaques. Correlation to symptoms and microembolic signals. *Stroke*.  
327 2014;45(12):3561-6.
- 328 21. Tarkin JM, Joshi FR, Evans NR, Chowdhury MM, Figg NL, Shah AV, et al. Detection of  
329 Atherosclerotic Inflammation by (68)Ga-DOTATATE PET Compared to [(18)F]FDG PET Imaging.  
330 *Journal of the American College of Cardiology*. 2017;69(14):1774-91.

331



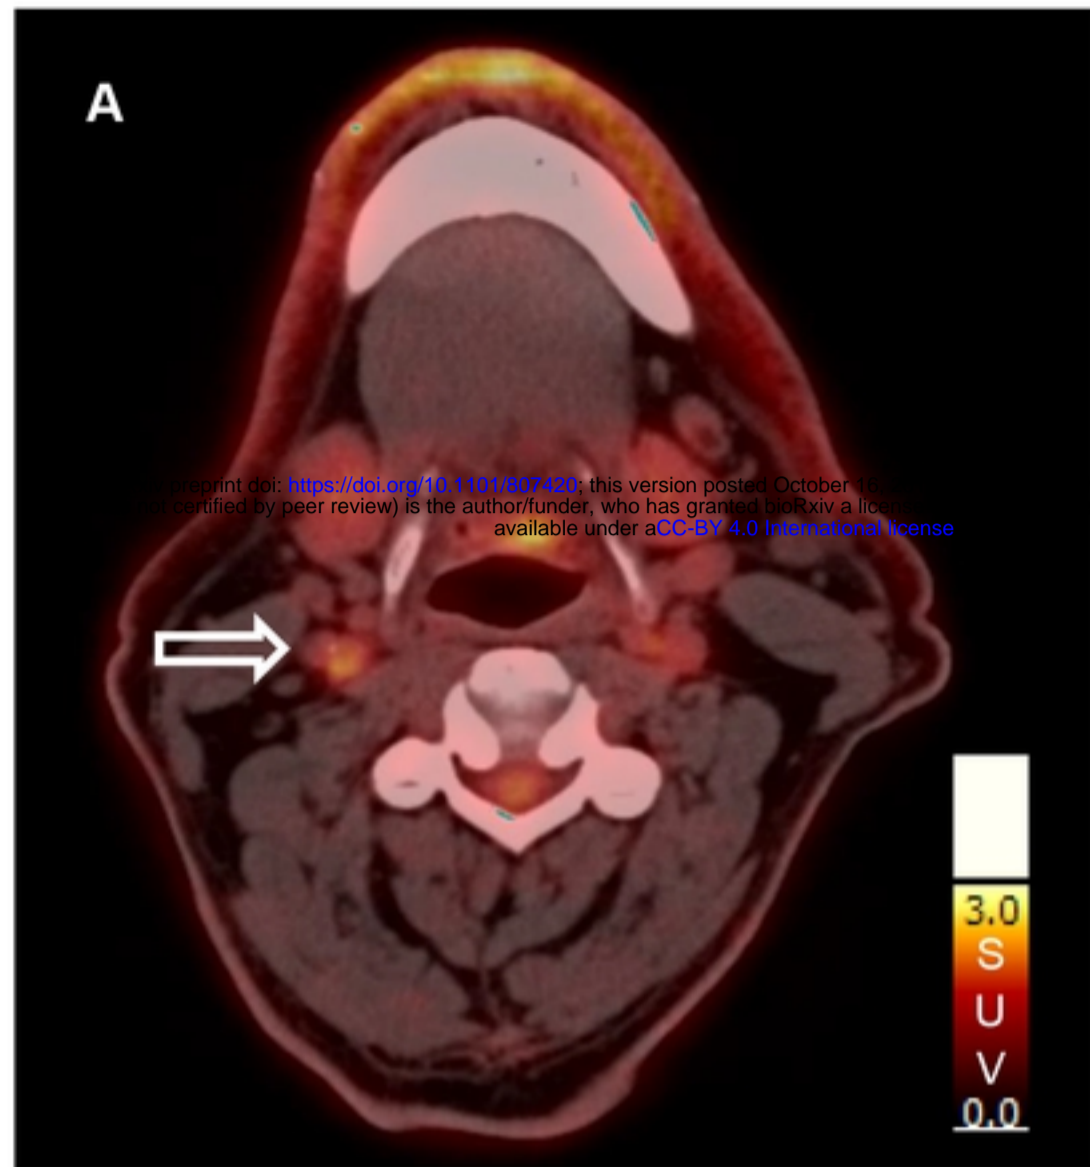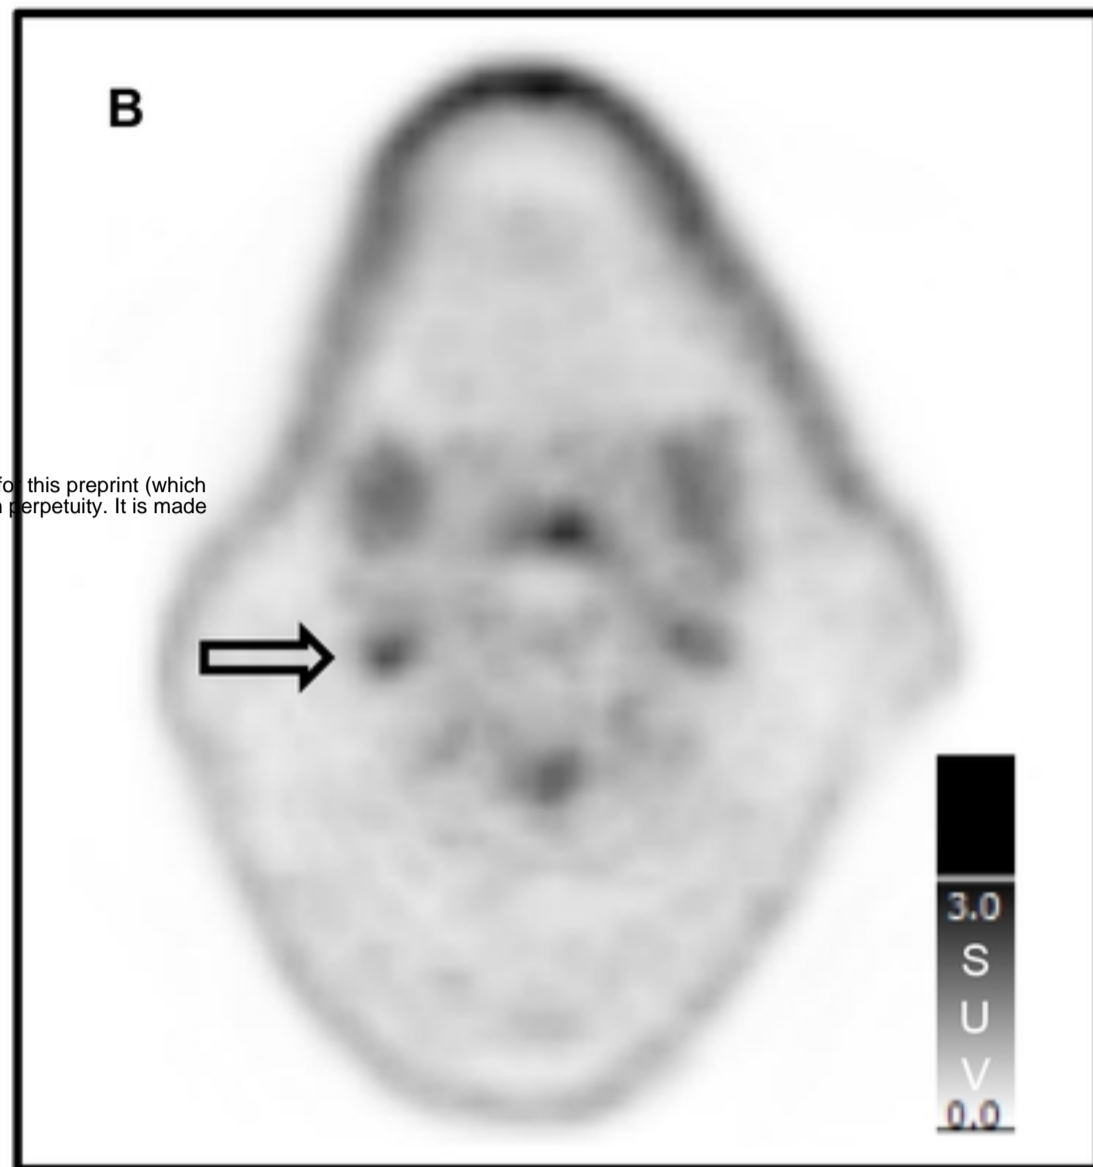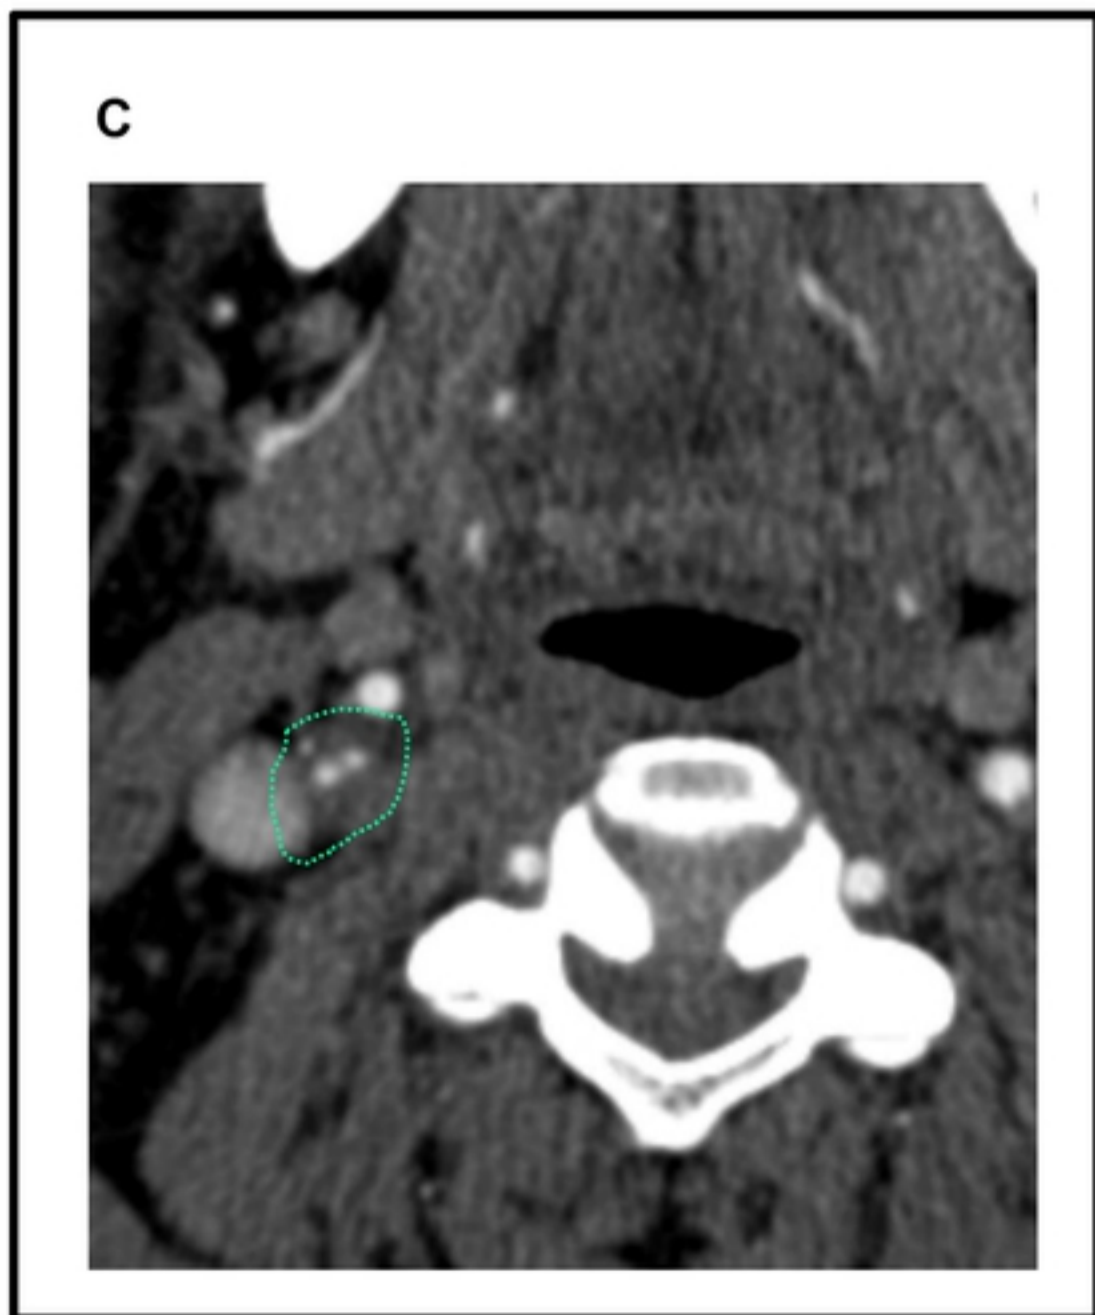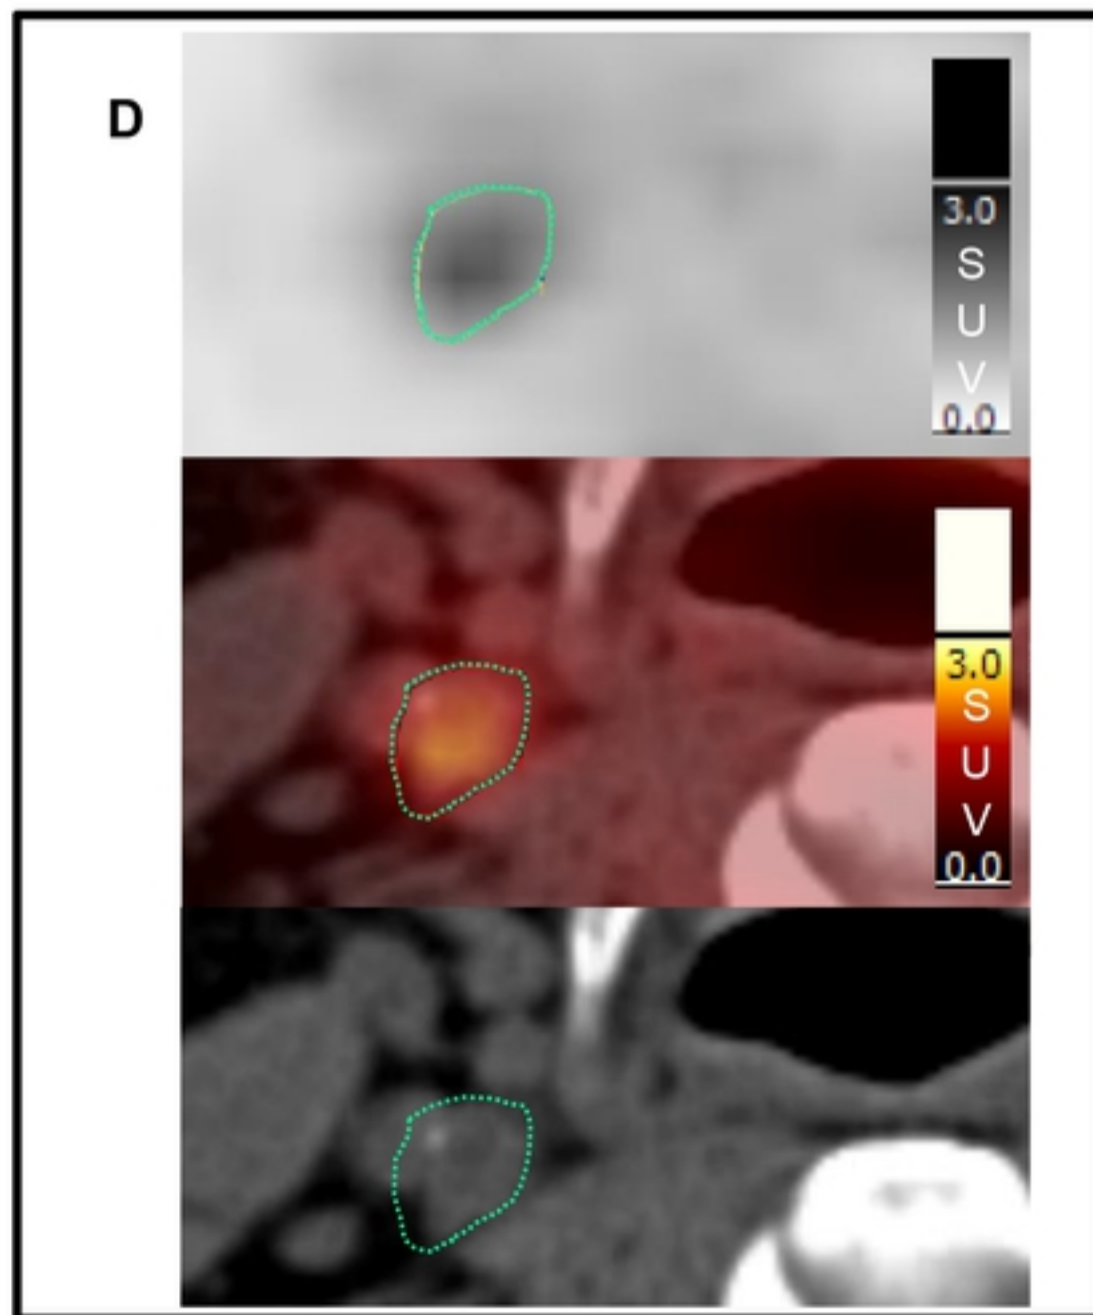

Fig1

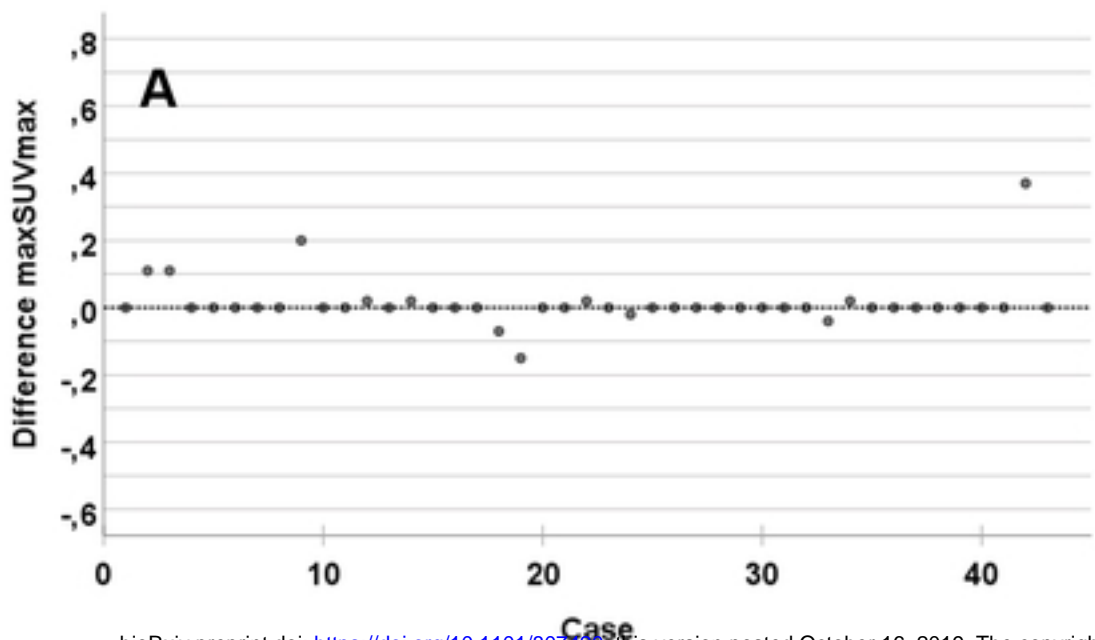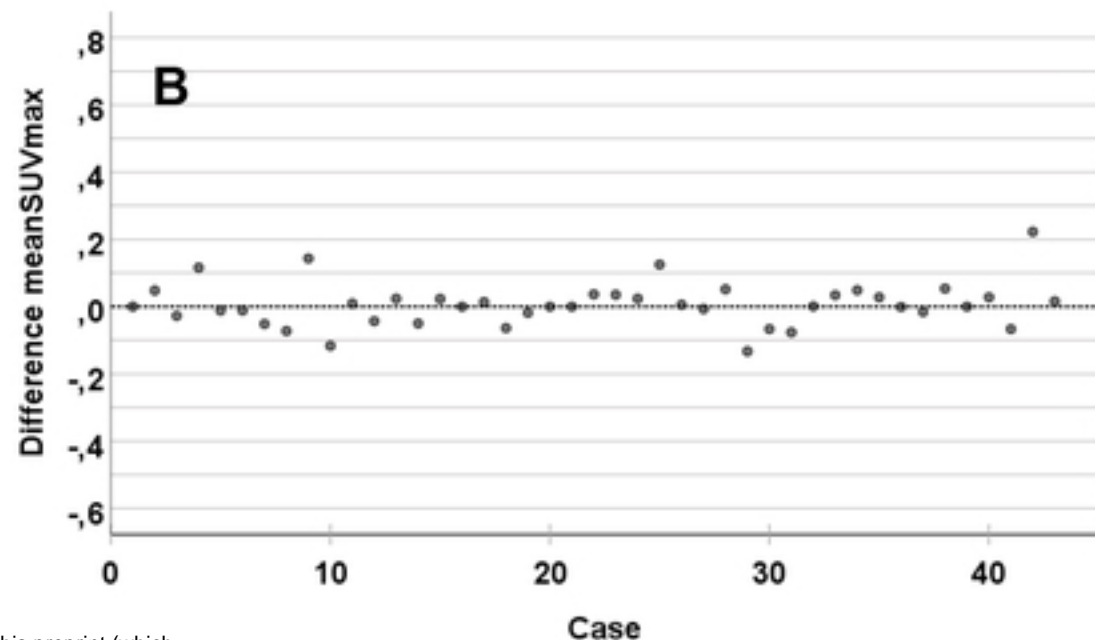

bioRxiv preprint doi: <https://doi.org/10.1101/807420>; this version posted October 16, 2019. The copyright holder for this preprint (which was not certified by peer review) is the author/funder, who has granted bioRxiv a license to display the preprint in perpetuity. It is made available under aCC-BY 4.0 International license.

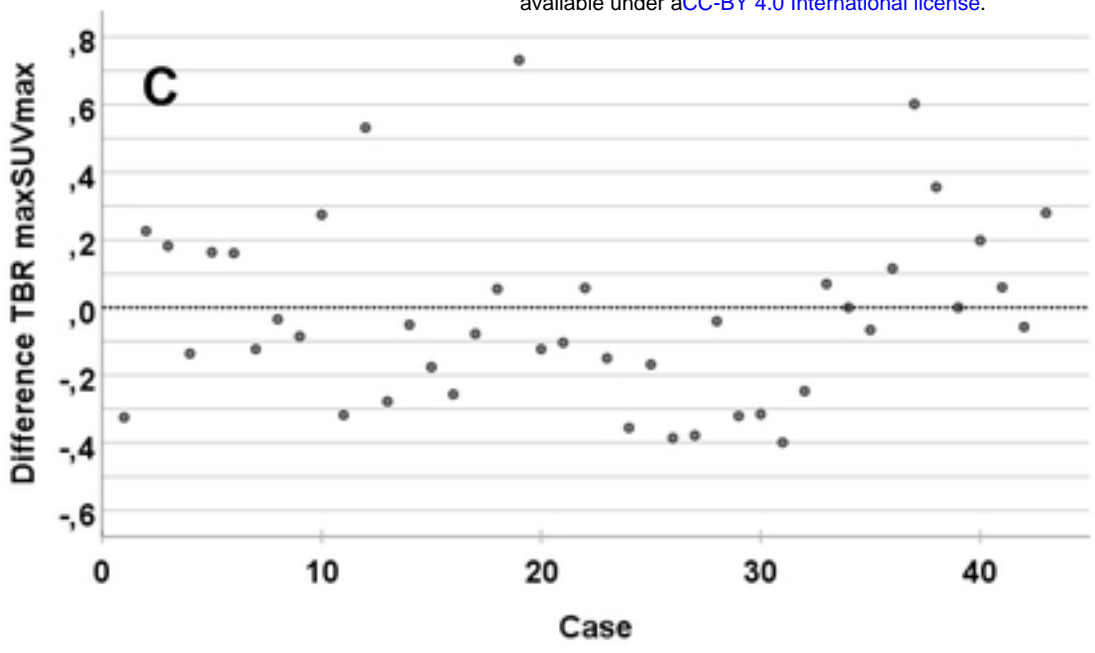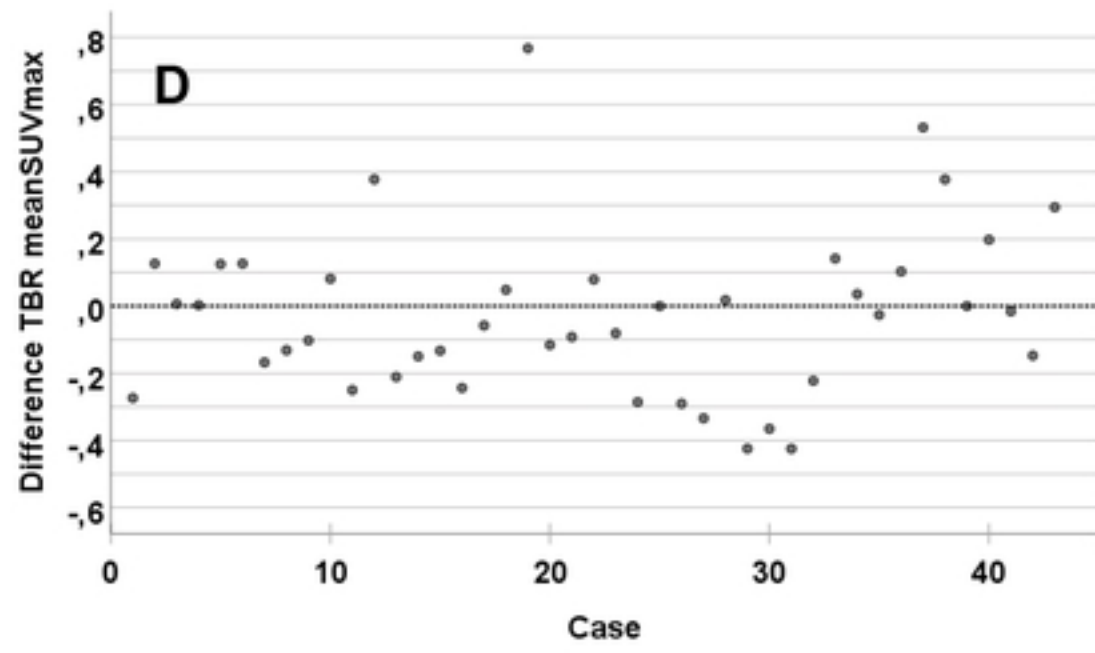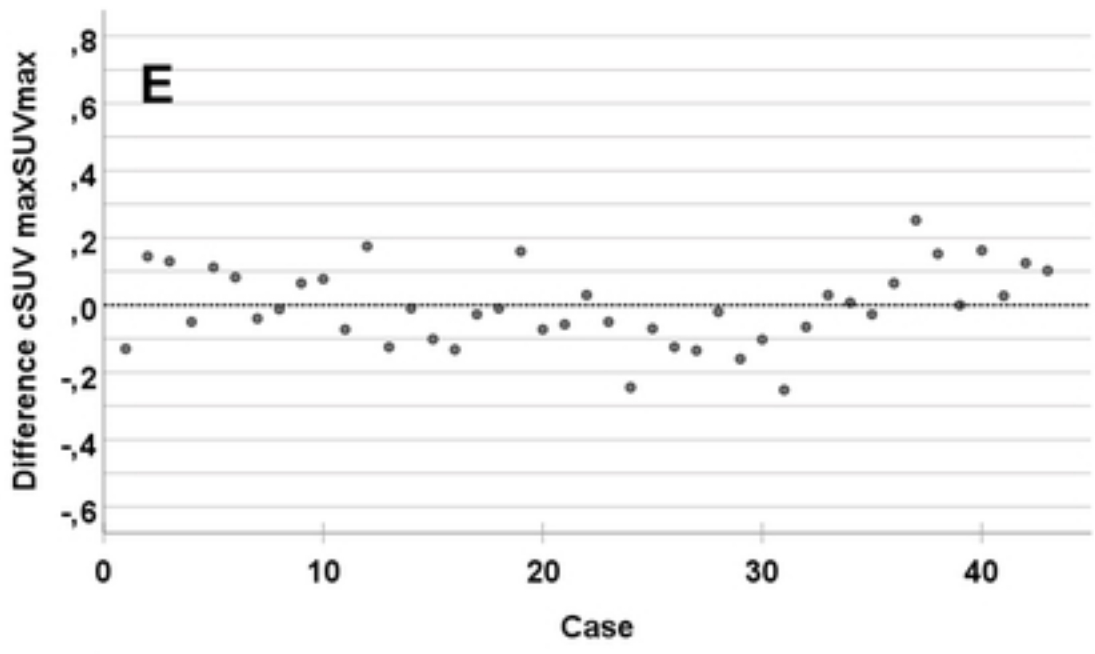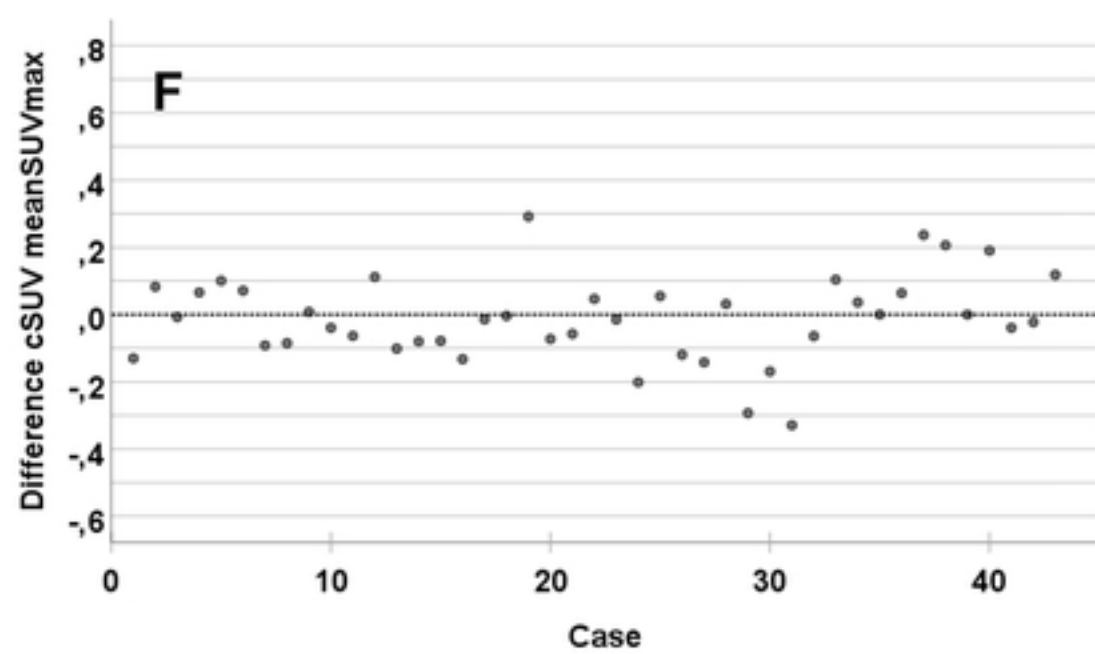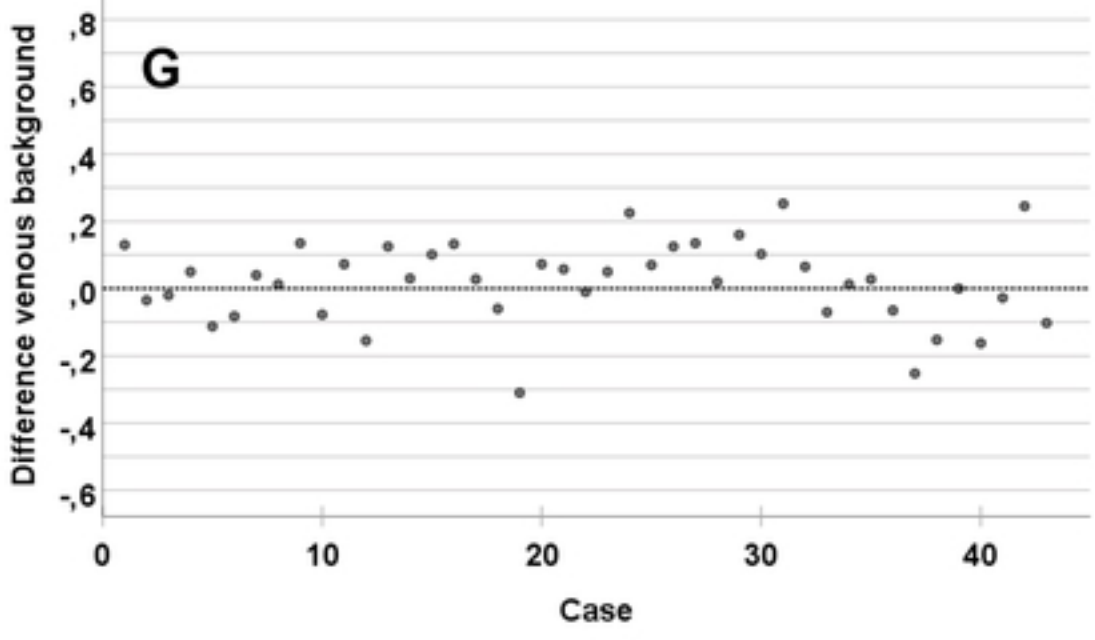

Fig2

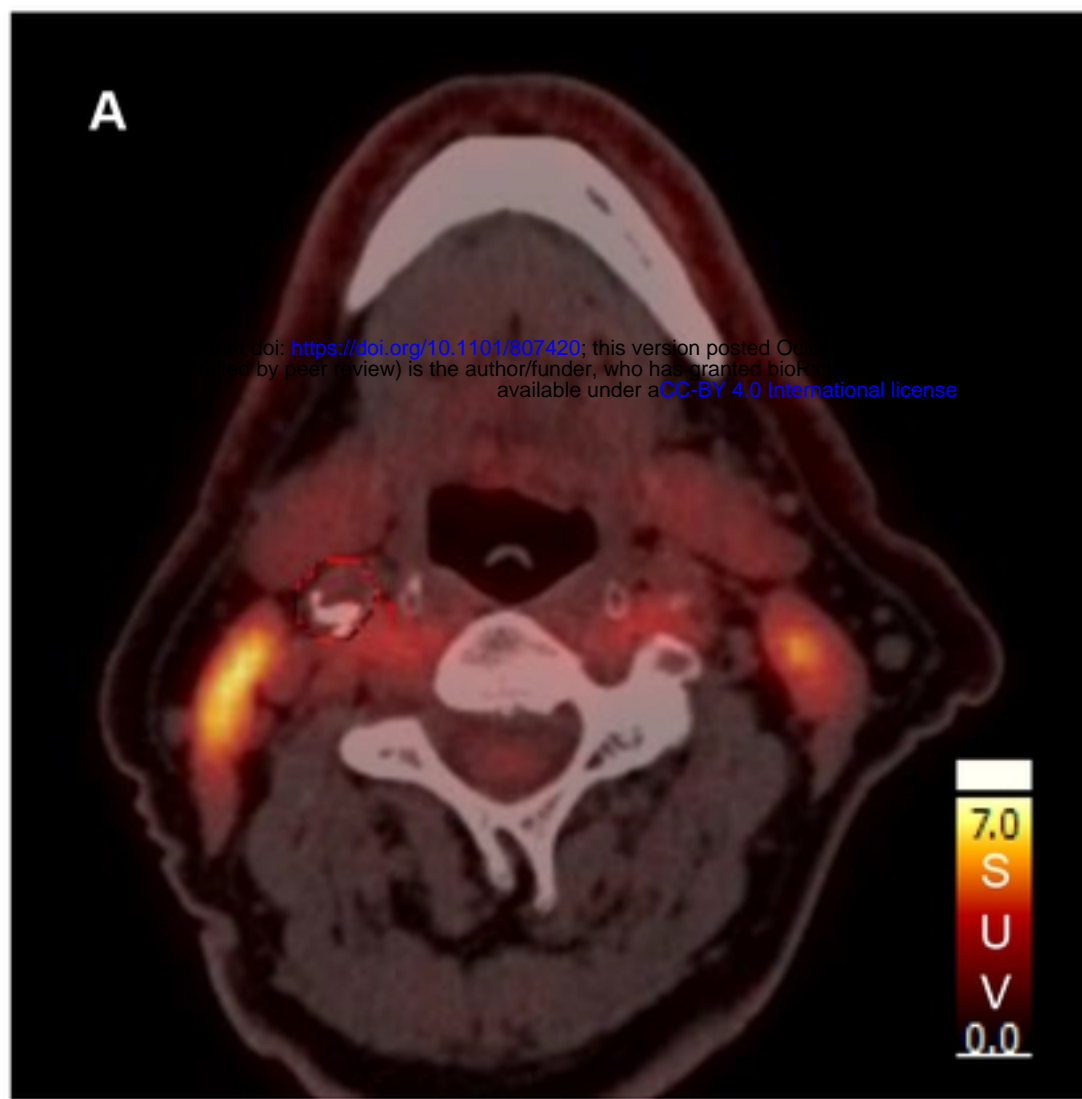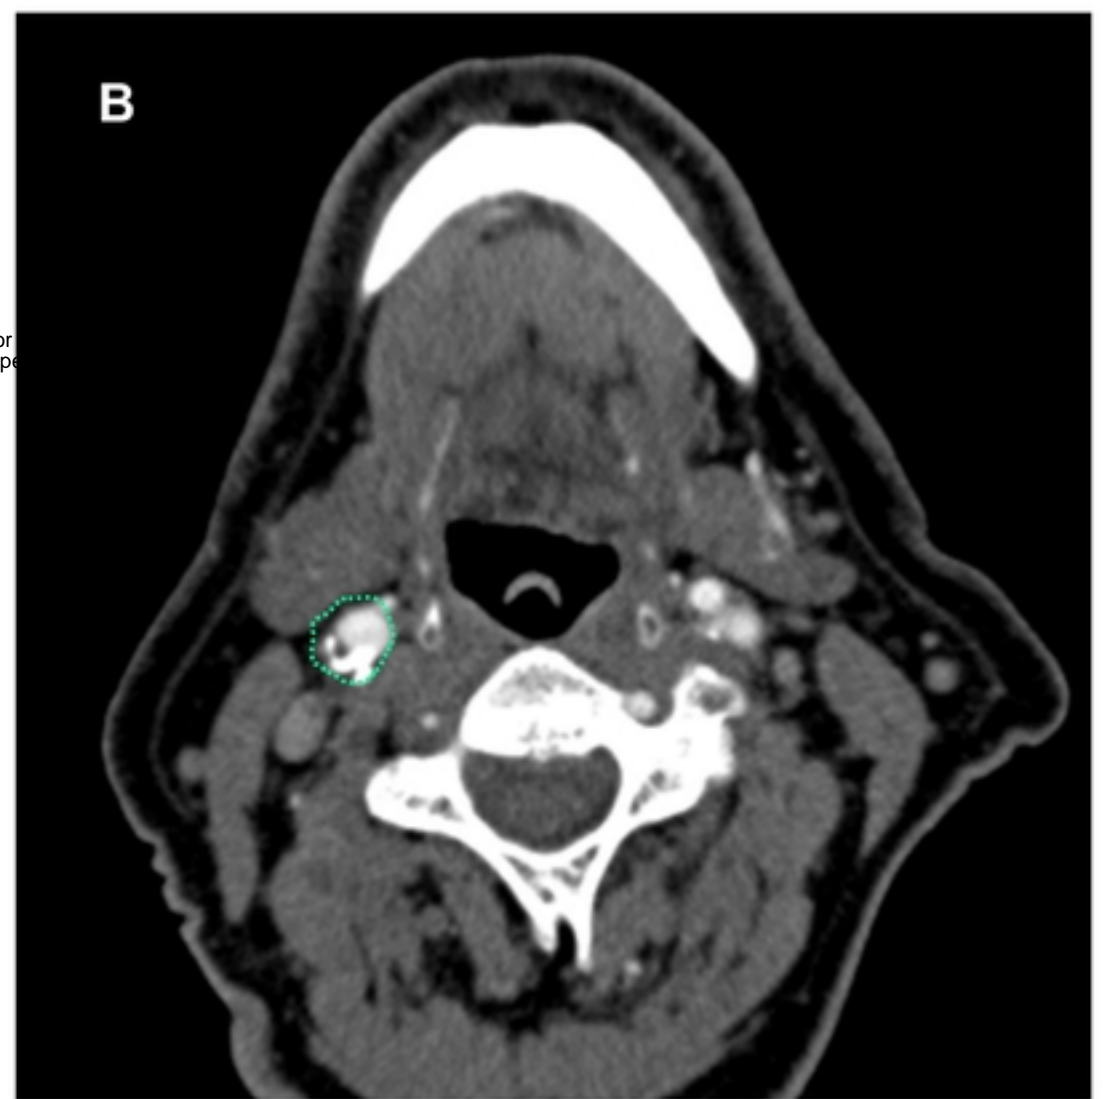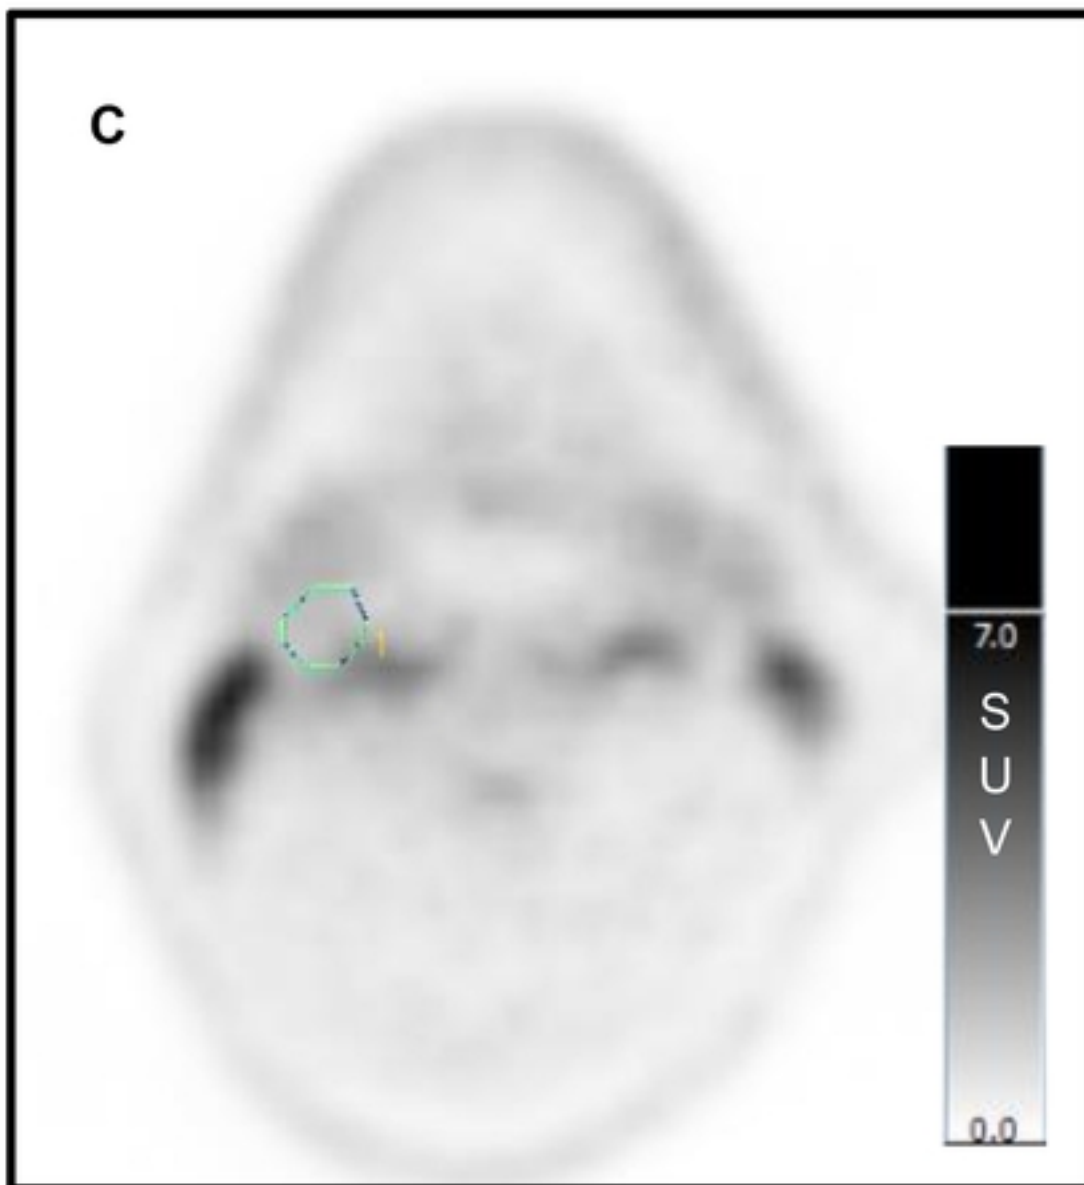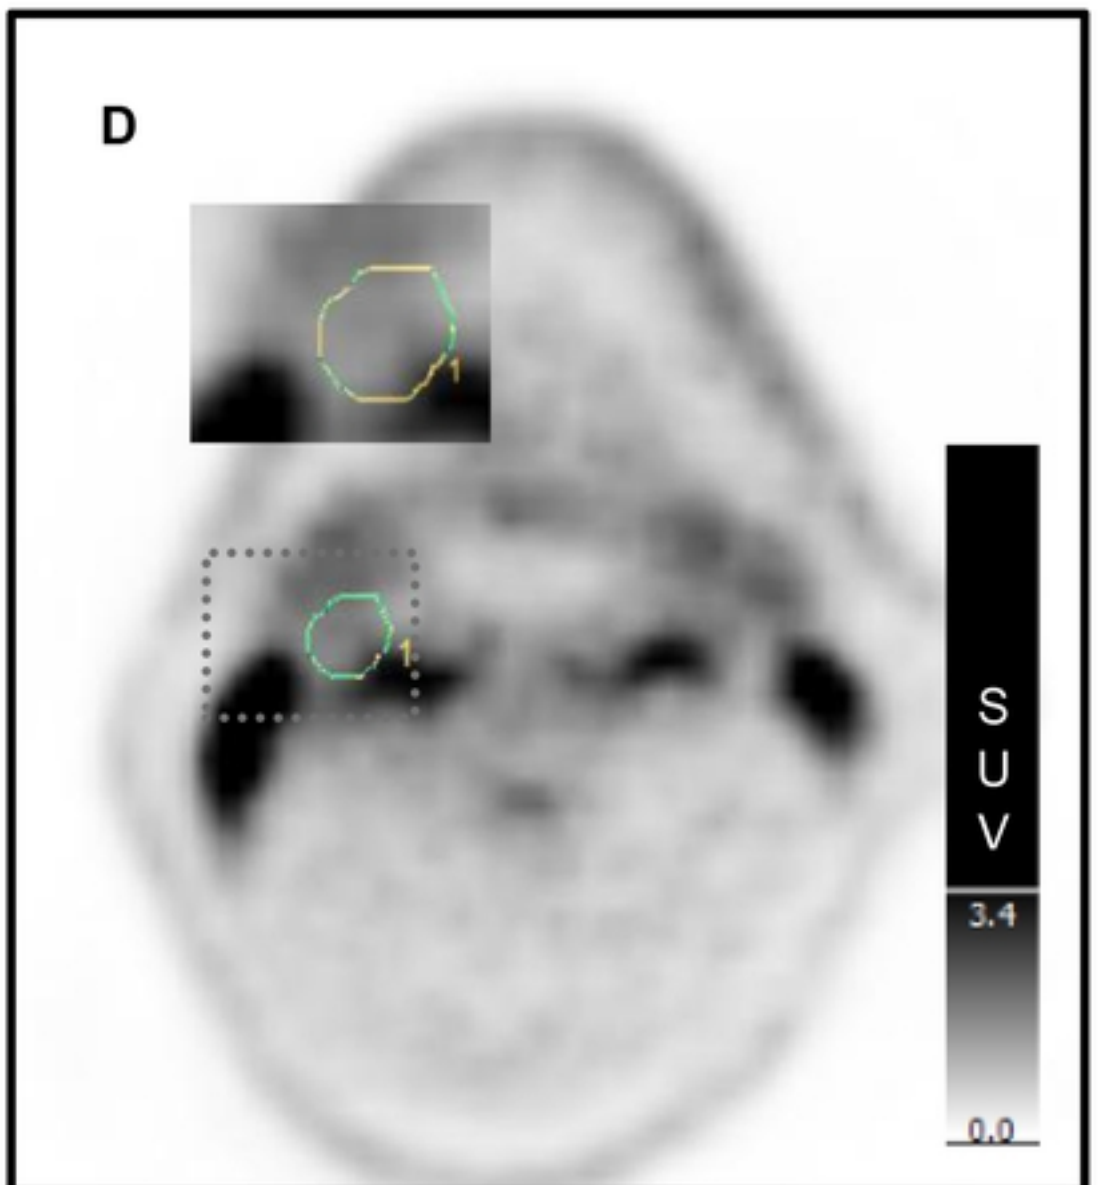

Fig3
